# Supplementary material
Source: publisher figshare collection journal article supplement (https://rs.figshare.com/ndownloader/files/7390057)
Supplement: Supplementary file [file 7390057]

## 1 **Supplementary**

### 2 **S1: Genotype isolation and genotyping**

3 All genotypes used were isolated from the same geographical region in the North Atlantic (south-east off  
4 Gran Canary, Spain, 27°59'N 15°22'W) between spring 2014- spring 2015. All genotypes of one species,  
5 with one exception, were isolated at once from a 2L seawater sample. More specifically, the *C. affinis*  
6 genotypes were isolated in December 2014, while *G. oceanica* was isolated in February 2015 and *E.*  
7 *huxleyi* were collected and isolated in February 2014 (except for GC22 which was isolated in February  
8 2015). All genotypes used in this experiment will be deposited in the Roscoff Culture Collection  
9 (<http://roscoff-culture-collection.org/>; Table S1)

10 All coccolithophore strains (i.e. *E. huxleyi* and *G. oceanica*) were genotyped using microsatellite (msat)  
11 analysis to assure that each culture used is a different strain (genotype). For *C. affinis* the msats are still  
12 under development. We nevertheless assume that all isolated single strains belong to a different  
13 genotype. Firstly, isolation of genotypes of all species followed the same protocol. Secondly, literature  
14 has shown that isolation of the same genotype from an amount of water, like we sampled in this study, is  
15 unlikely [1,2].

16 For microsatellite analysis DNA was extracted by adding 10 µL of TE-buffer to resuspend pellet of  
17 coccolithophores. Samples were then sonificated for 3 minutes at 100% and then incubated for 1h at  
18 56°C. Microsatellite amplification was done in the following reaction mix: 2.5µL multiplex mastermix  
19 (Qiagen), 0.25 µL 5pM forward and reverse primer (primers EHMS15b and P02E10b for *E. huxleyi* [3],  
20 primers GE06 and GE07 (Table S2.) for *G. oceanica*), 1 µL Q solution (Qiagen), 0.5 µL H2O and 0.5 µL of  
21 DNA template. The PCR reaction run for msat amplification was set up as follows: an initial phase of  
22 15min at 95°C, 30 cycles of 30sec at 94°C, 90sec at 57°C and 1min at 72°C and final step of 30 min at  
23 60°C. 1 µL PCR products was then added to a mix of ROX and Hidi (Qiagen) of 0.25 µL and 8.75 µL  
24 respectively and incubated for 3min at 94°C to denature double stranded products. The sequencer  
25 3130xl Genetic Analyzer (Applied Biosciences) was then used to analyse microsatellite composition of  
26 each sample and data was analysed using GeneMarker software.

27 **Table S1: All genotypes used are listed in the column “manuscript” under the name used in here and will be deposited in the**  
28 **Roscoff Culture Collection (RCC) under the name shown in the “RCC” column.**

| <i>C. affinis</i> |          | <i>E. huxleyi</i> |             | <i>G. oceanica</i> |           |
|-------------------|----------|-------------------|-------------|--------------------|-----------|
| Manuscript        | RCC      | Manuscript        | RCC         | Manuscript         | RCC       |
| <b>B13</b>        | EHGLL13B | <b>C48</b>        | EHGKLC48_20 | <b>GC31</b>        | EHGLLGC31 |
| <b>B75</b>        | EHGLL57B | <b>C30</b>        | EHGKLC30_20 | <b>GC33</b>        | EHGLLGC33 |
| <b>B63</b>        | EHGLL63B | <b>C35</b>        | EHGKLC35_20 | <b>GC36</b>        | EHGLLGC36 |
| <b>B64</b>        | EHGLL64B | <b>C91</b>        | EHGKLC91_20 | <b>GC40</b>        | EHGLLGC40 |
| <b>B67</b>        | EHGLL67B | <b>C96</b>        | EHGKLC96_20 | <b>GC58</b>        | EHGLLGC58 |
| <b>B68</b>        | EHGLL68B | <b>C47</b>        | EHGKLC47_20 | <b>GC59</b>        | EHGLLGC59 |
| <b>B74</b>        | EHGLL74B | <b>C41</b>        | EHGKLC41_20 | <b>GC60</b>        | EHGLLGC60 |
| <b>B81</b>        | EHGLL81B | <b>C42</b>        | EHGKLC42_20 | <b>GC86</b>        | EHGLLGC86 |
| <b>B82</b>        | EHGLL82B | <b>GC22</b>       | EHGLLGC22   | <b>GC89</b>        | EHGLLGC89 |

29 **Table S2: Primers used for *G. oceanica* msat analysis (strains N=9). Transcriptome as basis stems from Marine Microbial**  
 30 **Eukaryote Transcriptome Sequencing Project (MMETSP) [4] and is called Gephyrocapsa-oceanica-RCC1303**

| Primer name | Sequence             | Product length (from test) | Msat repeat unit     | No. Alleles |
|-------------|----------------------|----------------------------|----------------------|-------------|
| GE06Fm      | GTAATTGTCGTACGCCCG   | 162                        | (CT) <sub>17.5</sub> | 8           |
| GE06Rm      | CCAGGAATAGACTTAGGCCG |                            |                      |             |
| GE07Fm      | TGTCTCAGAGTCTCGCGG   | 189                        | (TC) <sub>19</sub>   | 8           |
| GE07Rm      | GAGTTTGTGGCTGTCCTTC  |                            |                      |             |

31

## 32 **S2: Relative contribution of genotypes in mixcultures**

33 The mixcultures consisted of all genotypes of one species that initially contributed the same number of  
 34 cells/mL. The relative contribution of each genotype was therefore 11 % at the start of the experiment  
 35 (Figure S1). To avoid differences in initial concentrations of the respective genotypes', the mixcultures  
 36 were inoculated from a stock mixculture prepared just before the start of the experiment. As in the  
 37 monoculture each experimental unit was inoculated with an initial total biovolume of 8280  $\mu\text{m}_3 \cdot \text{ml}^{-1}$   
 38 cells, resulting in an initial concentration of 20 cells $\cdot\text{ml}^{-1}$ , 180 cells $\cdot\text{ml}^{-1}$  and 24 cells $\cdot\text{ml}^{-1}$  for *C. affinis*,  
 39 *E. huxleyi* and *G. oceanica*, respectively.

40 Change in the relative contribution of genotypes in the mixcultures was not tested over the course of the  
 41 experiment. While we assumed that the relative genotypic contribution changes over time [5], we,  
 42 however, did not expect an actual loss of genotypes in this experiment with only one batch cycle.  
 43 Personal experience with the same *E. huxleyi* genotypes showed that a significant change in relative  
 44 abundance of the genotypes occurs after an experimental duration of four batch cycles while only one  
 45 genotype was actually lost after this time. This suggests that genotypic exclusion in *E. huxleyi* takes  
 46 longer than the experimental duration of this study. It also concurs with Lohbeck et al. (2012)  
 47 demonstrating that after 160 days (corresponding to ~ 30 batch cycles) only half of the initially present  
 48 six *E. huxleyi* genotypes were lost [6]. The maintenance of genotypes in comparatively short-termed  
 49 experiments can, however, also depend on the number of initially present genotypes. Sjöqvist and  
 50 Kremp (2016) showed that all genotypes in *Skeletonema marinoi* mixcultures remained present if the  
 51 cultures started with lower genotypic richness (i.e. 5 genotypes). In contrast higher initial genotypic  
 52 richness (i.e. 20 genotypes) enhanced exclusion [7]. The use of nine genotypes in this study corresponds  
 53 to a midrange genotype richness compared to Sjöqvist and Kremp's study, and thus supports that  
 54 genotype exclusion is expected to be low or almost negligible in our short term experiment.

55 However in future studies the negligible sorting and loss of genotypes over a short period of time (as  
 56 argued above) should be assessed by analysis of the final genotype contribution after the experiment.  
 57 This way the species reaction norm can be fully understood.

### 3 Species with each 9 genotypes (date of experiment 2016)

*C. Affinis* (11<sup>th</sup>-22<sup>nd</sup> July)

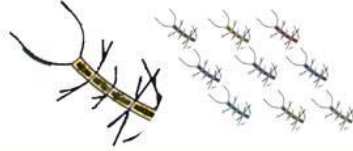

*E. Huxleyi* (9<sup>th</sup>-21<sup>st</sup> June)

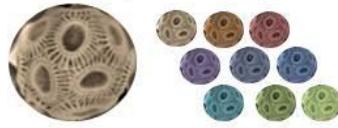

*G. Oceanica* (27<sup>th</sup> June- 12<sup>th</sup> July)

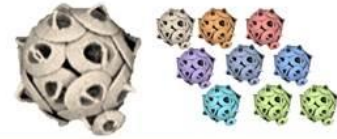

### Each genotype grown in a monoculture and in a mix under ambient and high CO<sub>2</sub>

Relative contribution of the genotypes in the mono- and mix-cultures of each species:

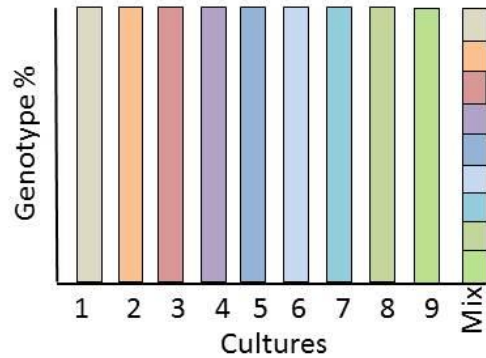

All cultures are exposed to a CO<sub>2</sub> treatment:

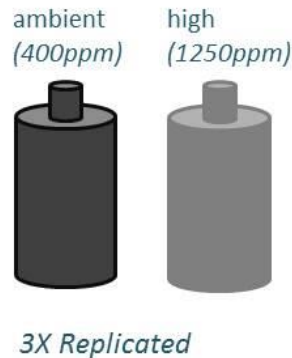

Culture volume: 660ml

Medium: N-limited

Rotation: 0.75 min<sup>-1</sup>

Temperature: 20 °C

Light intensity:  
350 μmol\*m<sup>-2</sup>\*s<sup>-1</sup>

### Daily sampling and experimental length

The development of each culture was followed:

- fluorescence measurements - diatom
- cell counts - coccolithophores

Not more than 10% of the volume sampled through the experiment.

Termination of cultures on 3<sup>rd</sup> day in stationary phase (9-16 days experimental duration).

58

59 **Figure S1: Overview of the experimental set up. Species and genotypes at the top, followed by general information of the**  
 60 **cultivation as well as the CO<sub>2</sub> treatments and genotype composition in Mono- and Mixcultures. In the initial phase of the**  
 61 **mixculture each of the nine genotypes contributes equally and is present with 11%. At the bottom are information about**  
 62 **daily sampling as well as experimental length.**

### 63 References

- 64 1. Evans, K. M., Bates, S. S., Medlin, L. K. & Hayes, P. K. 2004. Microsatellite marker development  
 65 and genetic variation in the toxic marine diatom *Pseudo-Nitzschia Multiseriata* (Bacillariophyceae).  
 66 (doi:10.1111/j.1529-8817.2004.04027.x)
- 67 2. Rynearson, T. A. & Armbrust, E. V. 2005 Maintenance of clonal diversity during a spring bloom of  
 68 the centric diatom *Ditylum brightwellii*. *Mol. Ecol.* **14**, 1631–1640. (doi:10.1111/j.1365-  
 69 294X.2005.02526.x)
- 70 3. Debora Iglesias-Rodriguez, M., Schofield, O. M., Batley, J., Medlin, L. K. & Hayes, P. K. 2006  
 71 Intraspecific genetic diversity in the marine coccolithophore *Emiliania huxleyi*  
 72 (Prymnesiophyceae): The use of microsatellite analysis in marine phytoplankton population  
 73 studies. *J. Phycol.* **42**, 526–536. (doi:10.1111/j.1529-8817.2006.00231.x)
- 74 4. Keeling, P. J. et al. 2014 The Marine Microbial Eukaryote Transcriptome Sequencing Project  
 75 (MMETSP): Illuminating the Functional Diversity of Eukaryotic Life in the Oceans through  
 76 Transcriptome Sequencing. *PLoS Biol.* **12**, e1001889. (doi:10.1371/journal.pbio.1001889)

- 77 5. Roger, F., Godhe, A. & Gamfeldt, L. 2012 Genetic Diversity and Ecosystem Functioning in the Face  
78 of Multiple Stressors. *PLoS One* **7**. (doi:10.1371/journal.pone.0045007)
- 79 6. Lohbeck, K. T., Riebesell, U. & Reusch, T. B. H. 2012 Adaptive evolution of a key phytoplankton  
80 species to ocean acidification. *Nat. Geosci.* **5**, 346–351. (doi:10.1038/ngeo1441)
- 81 7. Sjöqvist, C. O. & Kremp, A. 2016 Genetic diversity affects ecological performance and stress  
82 response of marine diatom populations. *ISME J.* , 1–12. (doi:10.1038/ismej.2016.44)
- 83
- 84
